# Supplementary material for: Green synthesis of multi-metallic nanocubes
Source: Royal Society of Chemistry journal article supplement (doi:10.1039/c7ra05493a), 2017-01-01
Supplement: c7ra05493a1.pdf [file c7ra05493a1.pdf]

## Electronic Supplementary Information

### Green synthesis of multi-metallic nanocubes

Nabanita Patra,<sup>a</sup> Ashoka Chary Taviti,<sup>b</sup> Anupam Sahoo,<sup>c</sup> Abhisek Pal,<sup>a</sup> Tushar Kant  
Beuria,<sup>\*,b</sup> Anindita Behera,<sup>a</sup> \*and Srikanta Patra<sup>c,\*</sup>

<sup>a</sup>*School of Pharmaceutical Sciences, Siksha 'O' Anusandhan University, Sumpur, Bhubaneswar, Bhubaneswar-751003, Orissa, India, Email: anindita02@gmail.com*

<sup>b</sup>*Institute of Life Sciences, Bhubaneswar, Odisha-751021, India, E-mail: tkbeuria@ils.res.in*

<sup>c</sup>*School of Basic Sciences, Indian Institute of Technology Bhubaneswar, Jatni, Odisha-752050, India, Email: srikanta@iitbbs.ac.in*

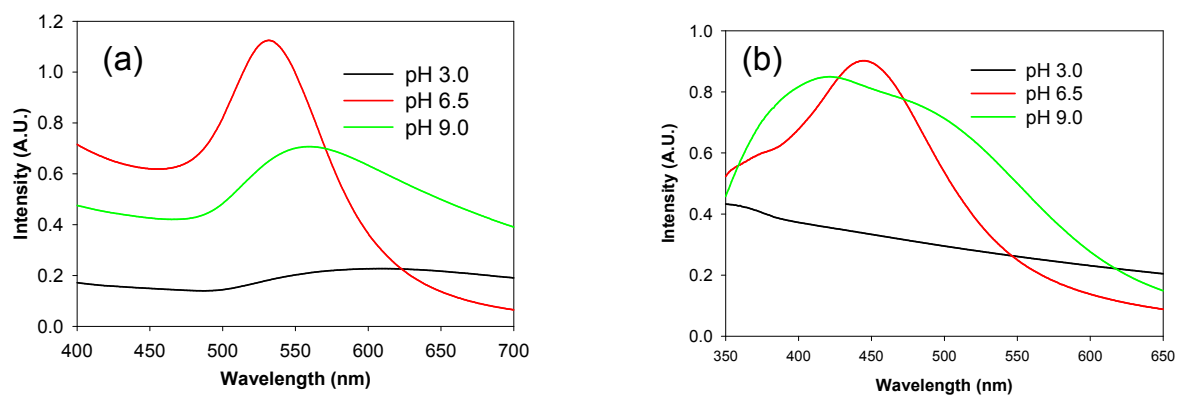

**Fig. S1** UV-Vis spectra showing the effect of pH on (a) AuNP, (b) AgNP using 0.25 mM metal ions and 50  $\mu$ L *MC* flower extract.

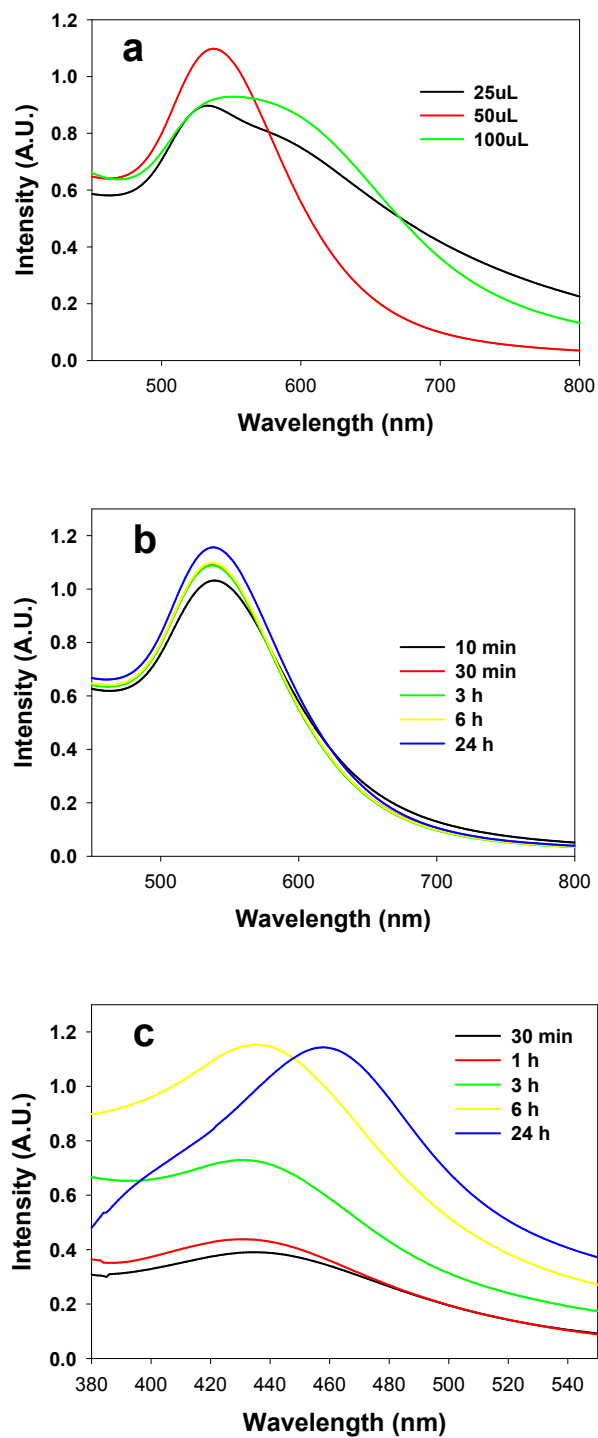

**Fig. S2.** UV-Vis spectra representing the effect of (a) extract volume on the formation of AuNP, and the effect of time on the formation of (b) AuNP and (c) AgNP using 50  $\mu$ L extract in 10 mL and 0.25 mM metal ions.

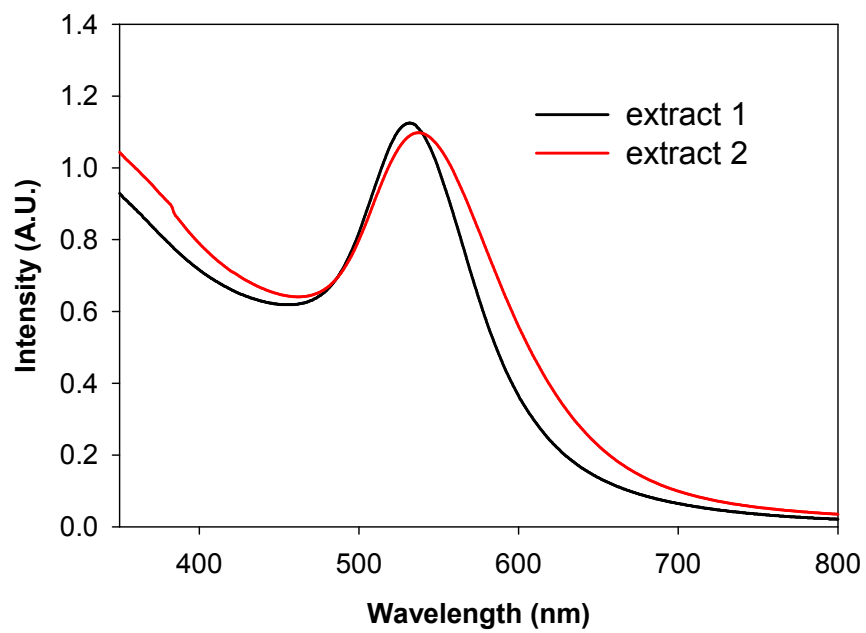

**Fig. S3.** UV-Vis spectra of AuNP prepared by using *MC* flower extracts collected from different places. Concentration of Au<sup>3+</sup> ions 0.25 mM.

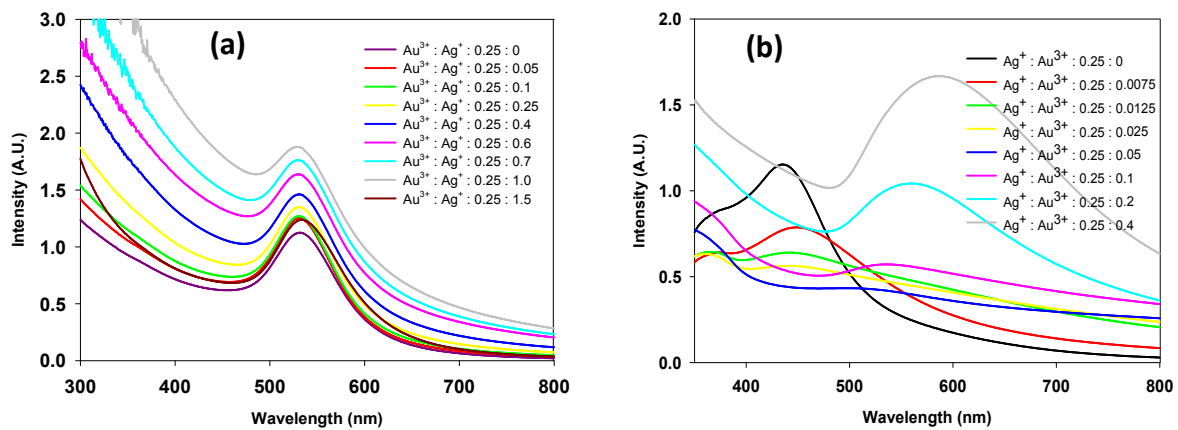

**Fig. S4.** UV-Vis spectra on the effect of addition of (a)  $\text{Ag}^+$  ion to AuNP and (b)  $\text{Au}^{3+}$  ion to AgNP solution. Concentrations are in mM.

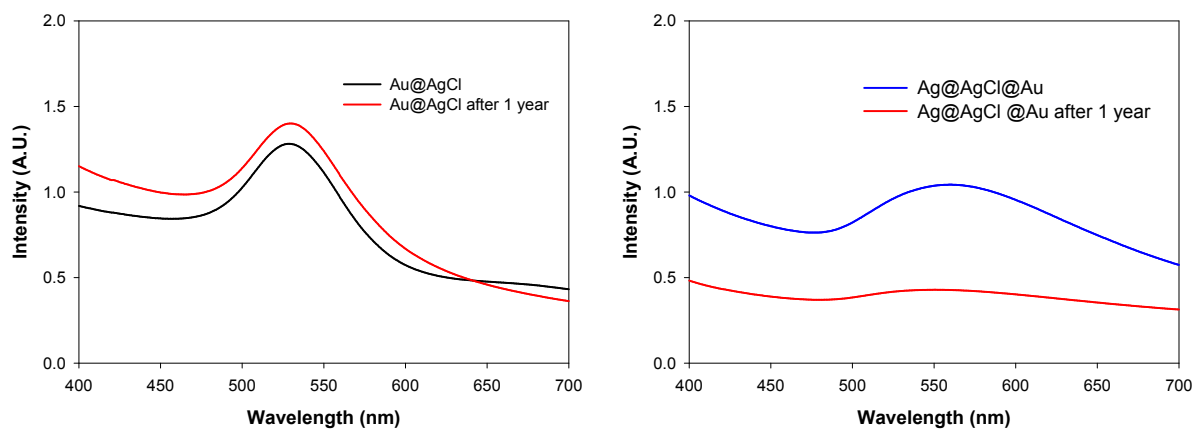

**Fig. S5.** UV-Vis spectra of as-synthesised (a) Au@AgClNP and (b) Ag@AgCl@AuNP before and after one year.

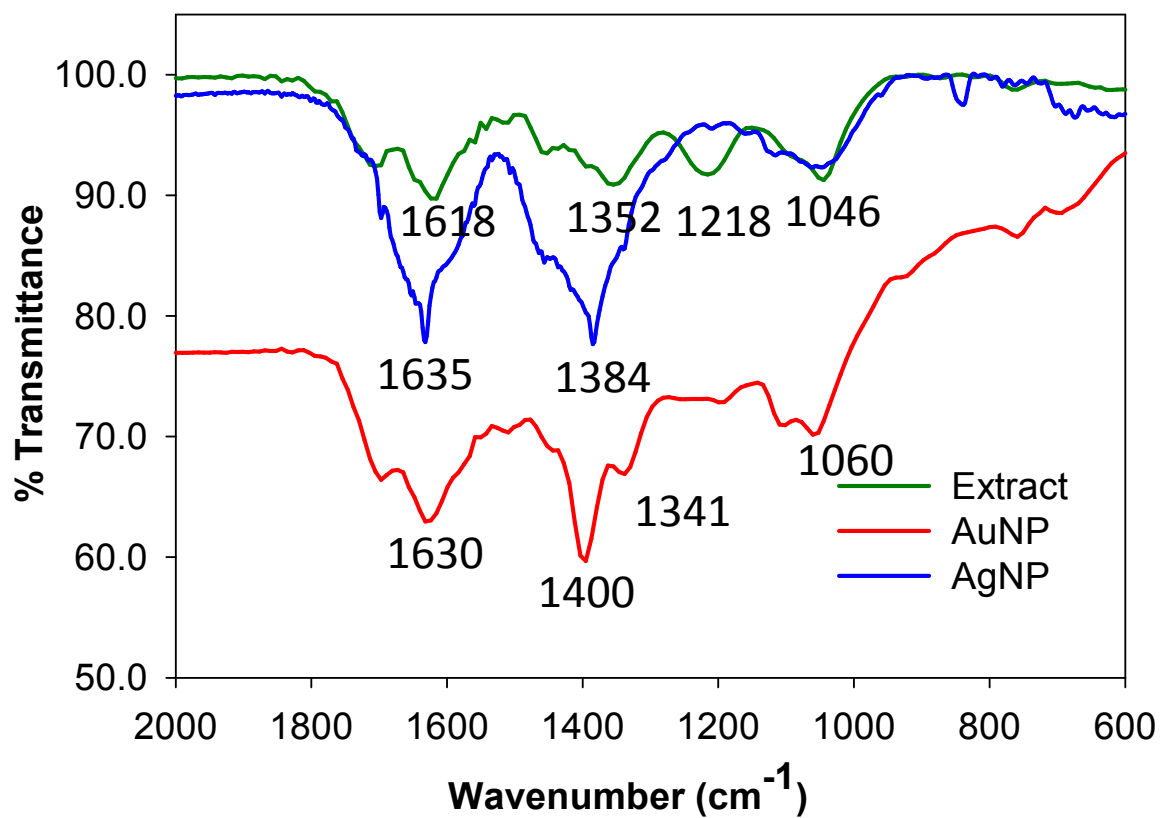

**Fig. S6** FTIR spectra of *MC* flower extract and extract conjugated nanoparticles.

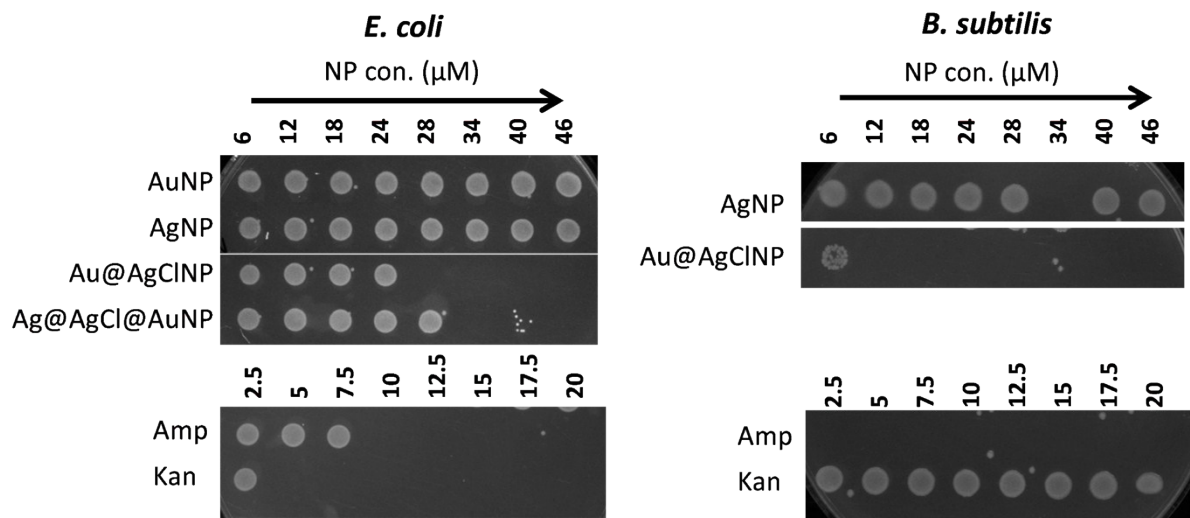

**Fig. S7** MBC were determined by spotting culture after MIC on MH-agar plates and grown at 37 °C for 12 h.
